# Supplementary material for: Understanding the role of Cu+/Cu0sites at Cu2O based catalysts in ethanol production from CO2electroreduction -A DFT study
Source: Royal Society of Chemistry journal article supplement (doi:10.1039/d2ra02753d), 2022-01-01
Supplement: d2ra02753d1.pdf [file d2ra02753d1.pdf]

# **Supporting Information for “Understanding the Role of Cu<sup>+</sup>/Cu<sup>0</sup> Sites at Cu<sub>2</sub>O Based Catalysts in Ethanol Production from CO<sub>2</sub> Electroreduction -A DFT Study”**

Liren Sun,<sup>a</sup> Jinyu Han,<sup>a</sup> Qingfeng Ge,<sup>a,b</sup> Xinli Zhu,<sup>a</sup> and Hua Wang<sup>\*a</sup>

<sup>a</sup>Collaborative Innovation Center of Chemical Science and Engineering, Key Laboratory for Green Chemical Technology, School of Chemical Engineering and Technology, Tianjin University, Tianjin 300350, China.

<sup>b</sup>Department of Chemistry and Biochemistry, Southern Illinois University, Carbondale Illinois 62901, United States.

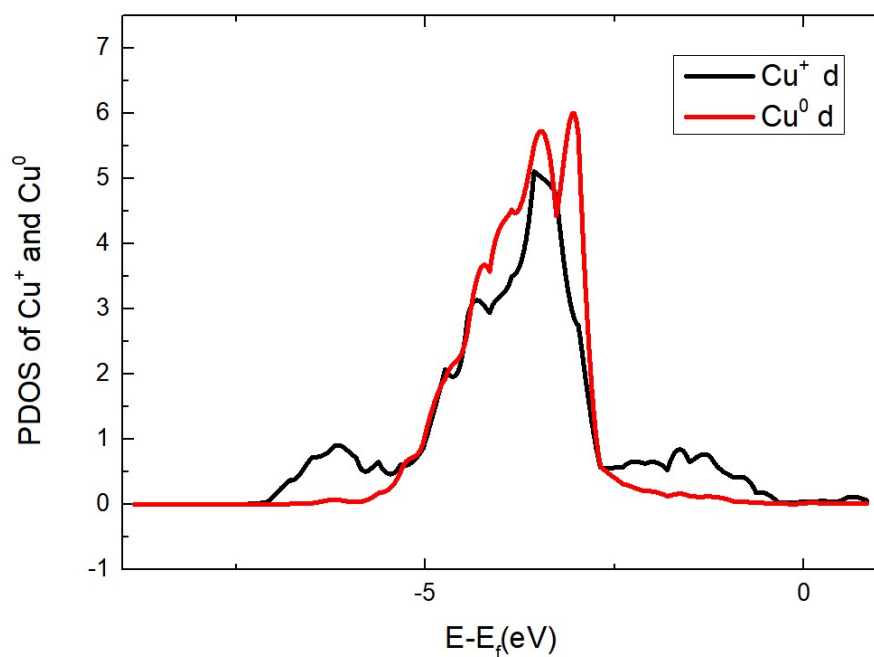

**Fig. S1** Projected density of states (DOSs) of  $\text{Cu}^0$  atom (red line) and  $\text{Cu}^+$  atom (black line) in structure  $\text{Cu}_{32}\text{O}_8(100)$ .

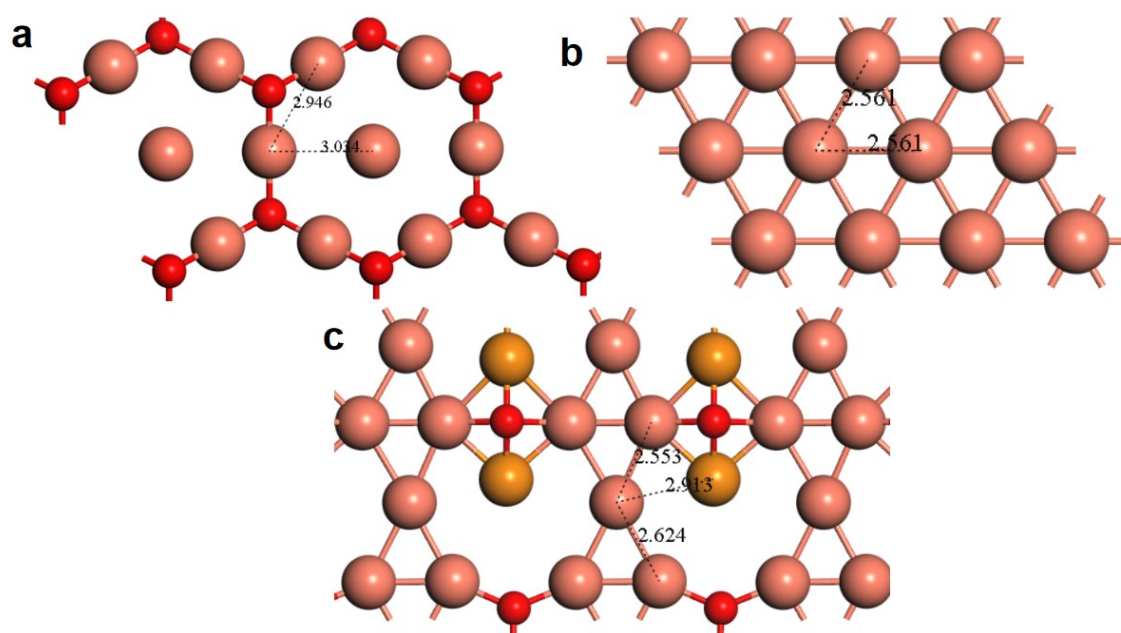

**Fig. S2** The configuration of (a)  $\text{Cu}_2\text{O}(111)$  surface (b)  $\text{Cu}(111)$  surface (c)  $\text{Cu}^+/\text{Cu}^0$  surface. Distances between Cu atoms are marked. (Cu atoms are in orange red and O atoms are in red,  $\text{Cu}^+$  atoms in (c) are in orange).

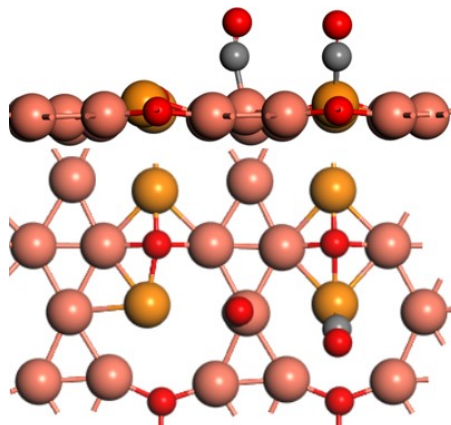

**Fig. S3** The configuration of two \*CO intermediates on Cu<sup>+</sup> and Cu<sup>0</sup> sites.

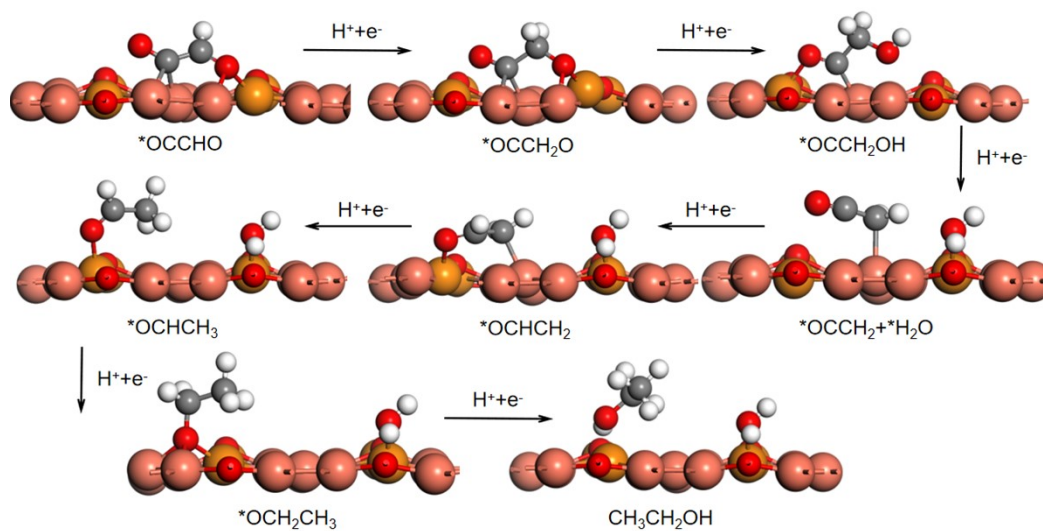

**Fig. S4** The configuration of reaction intermediates for the later reduction of \*OCCHO to ethanol.

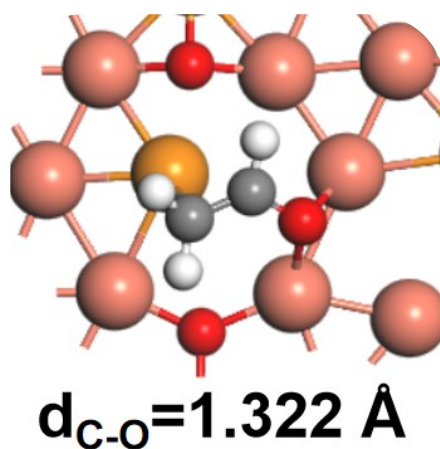

**Fig. S5** Configuration of \*OCHCH<sub>2</sub> with O atom combining to the Cu<sup>0</sup> site.

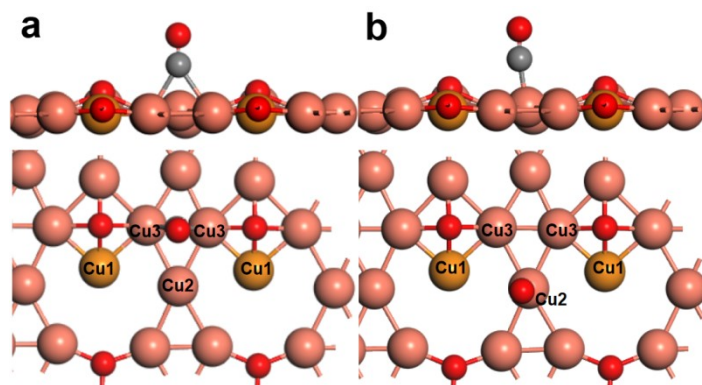

**Fig. S6** (a) The structure of CO adsorbing on Cu3 atoms before optimization. (b) The structure after optimization of CO adsorbing on Cu3 atoms.

As shown in Fig S6, though we set a relative short distance between the CO and Cu3 atom in the initial configuration, as a result, CO adsorbs on the Cu2 atom in the final configuration after the optimization calculations. Cu3 atoms are not the crucial active sites in the adsorption of CO.

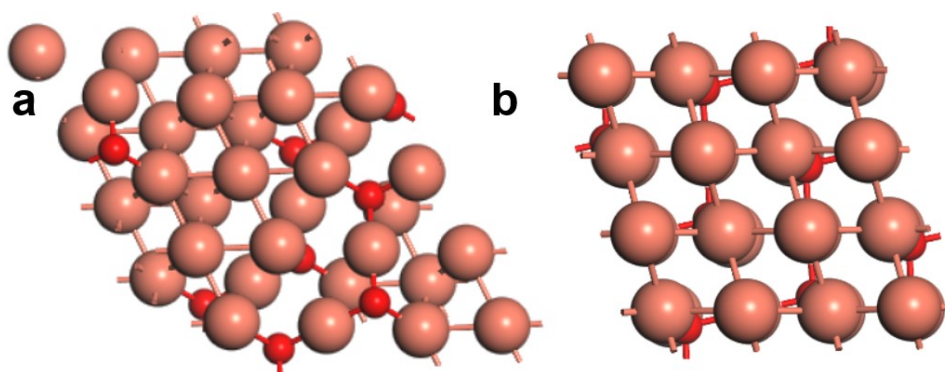

**Fig. S7** Top surface of (a)  $\text{Cu}_{32}\text{O}_8$  (111) and (b)  $\text{Cu}_{32}\text{O}_8$  (010) facet.

**Table S1.** Free energy contributions for molecules at 298.15K.

| Molecule                         | $E_{\text{elec}}$ (eV) | ZPE (eV) | -TS (eV) | G (eV)  | $G-E_{\text{elec}}$ (eV) |
|----------------------------------|------------------------|----------|----------|---------|--------------------------|
| CO                               | -14.797                | 0.142    | 0.611    | -15.266 | -0.469                   |
| H <sub>2</sub> O                 | -14.224                | 0.566    | 0.581    | -14.239 | -0.015                   |
| C <sub>2</sub> H <sub>4</sub>    | -31.571                | 1.358    | 0.684    | -30.897 | 0.674                    |
| C <sub>2</sub> H <sub>5</sub> OH | -46.933                | 2.113    | 0.874    | -45.694 | 1.239                    |
| CH <sub>3</sub> CHO              | -38.969                | 1.473    | 0.821    | -38.317 | 0.652                    |

**Table S2.** Calculated electronic energies and corresponding free energies of adsorbed intermediates on Cu<sup>+</sup>/Cu<sup>0</sup> surface at 298.15 K

| Species/Adsorbates                              | $E_{\text{elec}}$ (eV) | ZPE (eV) | -TS (eV) | G (eV)  | $G-E_{\text{elec}}$ (eV) |
|-------------------------------------------------|------------------------|----------|----------|---------|--------------------------|
| Cu-Cu <sub>2</sub> O                            | -206.77                | 3.397    | 8.109    | -211.48 | -4.712                   |
| *CO(Cu <sup>+</sup> )                           | -222.03                | 3.208    | 8.402    | -227.23 | -5.194                   |
| *CO(TS)                                         | -221.65                | 3.149    | 8.167    | -226.66 | -5.017                   |
| *CO(Cu <sup>0</sup> )                           | -221.74                | 3.241    | 8.333    | -226.83 | -5.093                   |
| *CO+*CO                                         | -237.55                | 3.353    | 8.307    | -242.51 | -4.954                   |
| *CO+*CHO                                        | -240.26                | 3.609    | 8.438    | -245.09 | -4.830                   |
| *CO+*COH                                        | -239.55                | 3.601    | 8.082    | -244.03 | -4.481                   |
| *OCCHO                                          | -240.48                | 3.678    | 8.245    | -245.04 | -4.566                   |
| *OCCOH                                          | -239.99                | 3.696    | 8.390    | -244.68 | -4.694                   |
| *OCCH <sub>2</sub> O                            | -244.74                | 3.999    | 8.284    | -249.02 | -4.285                   |
| *OCCH <sub>2</sub> OH                           | -248.45                | 4.306    | 8.321    | -252.47 | -4.015                   |
| *OCCH <sub>2</sub>                              | -252.93                | 4.530    | 8.392    | -256.80 | -3.862                   |
| *OCHCH <sub>2</sub>                             | -257.27                | 4.836    | 8.463    | -260.89 | -3.628                   |
| *OCHCH <sub>3</sub>                             | -261.13                | 5.110    | 8.515    | -264.53 | -3.405                   |
| *OCH <sub>2</sub> CH <sub>3</sub>               | -265.20                | 5.475    | 8.514    | -268.24 | -3.038                   |
| *HOCH <sub>2</sub> CH <sub>3</sub>              | -269.35                | 5.757    | 8.514    | -272.11 | -2.757                   |
| *OCCHOH                                         | -244.27                | 4.002    | 8.280    | -248.55 | -4.278                   |
| *HOCCHO                                         | -244.37                | 4.006    | 8.555    | -248.92 | -4.549                   |
| *HOCCH <sub>2</sub> O                           | -247.66                | 4.307    | 8.276    | -251.63 | -3.969                   |
| *HOCCH <sub>2</sub> OH                          | -251.45                | 4.616    | 8.280    | -255.11 | -3.664                   |
| *HOCCH <sub>2</sub>                             | -256.53                | 4.870    | 8.416    | -260.07 | -3.547                   |
| *OCCH <sub>3</sub>                              | -256.90                | 4.819    | 8.387    | -260.47 | -3.567                   |
| *HOCHCH <sub>3</sub>                            | -264.45                | 5.459    | 8.390    | -267.38 | -2.931                   |
| *O+C <sub>2</sub> H <sub>4</sub>                | -261.04                | 5.134    | 8.418    | -264.32 | -3.284                   |
| *OH+C <sub>2</sub> H <sub>4</sub>               | -265.05                | 5.385    | 8.446    | -268.12 | -3.061                   |
| *H <sub>2</sub> O+C <sub>2</sub> H <sub>4</sub> | -268.99                | 5.676    | 8.379    | -271.69 | -2.703                   |

**Table S3.** Reaction energy and reaction free energy at 0V vs. RHE of adsorbate statescalculated at 298.15 K on Cu<sup>+</sup>/Cu<sup>0</sup> surface.

| Species/Adsorbates                              | State                                                                                  | $\Delta E$ (eV) | $\Delta G$ (eV) |
|-------------------------------------------------|----------------------------------------------------------------------------------------|-----------------|-----------------|
| *OCCHO                                          | *OCCHO+7(H <sup>+</sup> +e <sup>-</sup> )                                              | 0.00            | 0.00            |
| *OCCH <sub>2</sub> O                            | *OCCH <sub>2</sub> O+6(H <sup>+</sup> +e <sup>-</sup> )                                | -0.881          | -0.600          |
| *OCCH <sub>2</sub> OH                           | *OCCH <sub>2</sub> OH+5(H <sup>+</sup> +e <sup>-</sup> )                               | -1.217          | -0.665          |
| *OCCH <sub>2</sub>                              | *OCCH <sub>2</sub> +*H <sub>2</sub> O+4(H <sup>+</sup> +e <sup>-</sup> )               | -2.319          | -1.614          |
| *OCHCH <sub>2</sub>                             | *OCHCH <sub>2</sub> +*H <sub>2</sub> O+3(H <sup>+</sup> +e <sup>-</sup> )              | -3.272          | -2.333          |
| *OCHCH <sub>3</sub>                             | *OCHCH <sub>3</sub> +*H <sub>2</sub> O+2(H <sup>+</sup> +e <sup>-</sup> )              | -3.753          | -2.591          |
| *OCH <sub>2</sub> CH <sub>3</sub>               | *OCH <sub>2</sub> CH <sub>3</sub> +*H <sub>2</sub> O+(H <sup>+</sup> +e <sup>-</sup> ) | -4.451          | -2.923          |
| *HOCH <sub>2</sub> CH <sub>3</sub>              | *HOCH <sub>2</sub> CH <sub>3</sub> +*H <sub>2</sub> O                                  | -5.221          | -3.411          |
| *HOCCHO                                         | *HOCCHO+6(H <sup>+</sup> +e <sup>-</sup> )                                             | -0.415          | -0.494          |
| *OCCHOH                                         | *OCCHOH+6(H <sup>+</sup> +e <sup>-</sup> )                                             | -0.512          | -0.127          |
| *HOCCH <sub>2</sub> O                           | *HOCCH <sub>2</sub> O+5(H <sup>+</sup> +e <sup>-</sup> )                               | -0.427          | 0.171           |
| *HOCCH <sub>2</sub> OH                          | *HOCCH <sub>2</sub> OH+4(H <sup>+</sup> +e <sup>-</sup> )                              | -0.831          | 0.072           |
| *HOCCH <sub>2</sub>                             | *HOCCH <sub>2</sub> +*H <sub>2</sub> O+3(H <sup>+</sup> +e <sup>-</sup> )              | -2.531          | -1.511          |
| *OCCH <sub>3</sub>                              | *OCCH <sub>3</sub> +*H <sub>2</sub> O+3(H <sup>+</sup> +e <sup>-</sup> )               | -2.904          | -1.905          |
| *HOCHCH <sub>3</sub>                            | *HOCHCH <sub>3</sub> +*H <sub>2</sub> O+(H <sup>+</sup> +e <sup>-</sup> )              | -3.694          | -2.058          |
| *O+C <sub>2</sub> H <sub>4</sub>                | *O+C <sub>2</sub> H <sub>4</sub> +*H <sub>2</sub> O+2(H <sup>+</sup> +e <sup>-</sup> ) | -3.661          | -2.379          |
| *OH+C <sub>2</sub> H <sub>4</sub>               | *OH+C <sub>2</sub> H <sub>4</sub> +*H <sub>2</sub> O+(H <sup>+</sup> +e <sup>-</sup> ) | -4.301          | -2.583          |
| *H <sub>2</sub> O+C <sub>2</sub> H <sub>4</sub> | C <sub>2</sub> H <sub>4</sub> +2*H <sub>2</sub> O                                      | -4.857          | -2.731          |

## Details about $\text{Cu}_{32}\text{O}_8$ bulk

We study the oxygen desorption progress by layer-by-layer manner, which is energetically more favorable than random deoxidation manner. In order to simulate the oxygen desorption from bulk CuO, four O atoms were removed each time from the initial cell of  $(\text{CuO})_{32}$  in the (111) plane. After 8 steps of deoxidation by following the layer-by-layer mode, 32 O atoms were removed, resulting in the  $\text{Cu}_{32}$ . Note that both volume and symmetry have changed during the reduction from monoclinic CuO to cubic  $\text{Cu}_2\text{O}$  and Cu. Therefore, after each step of oxygen desorption, we used SSW-NN method to reconstruct the  $\text{CuO}_x$  structure.

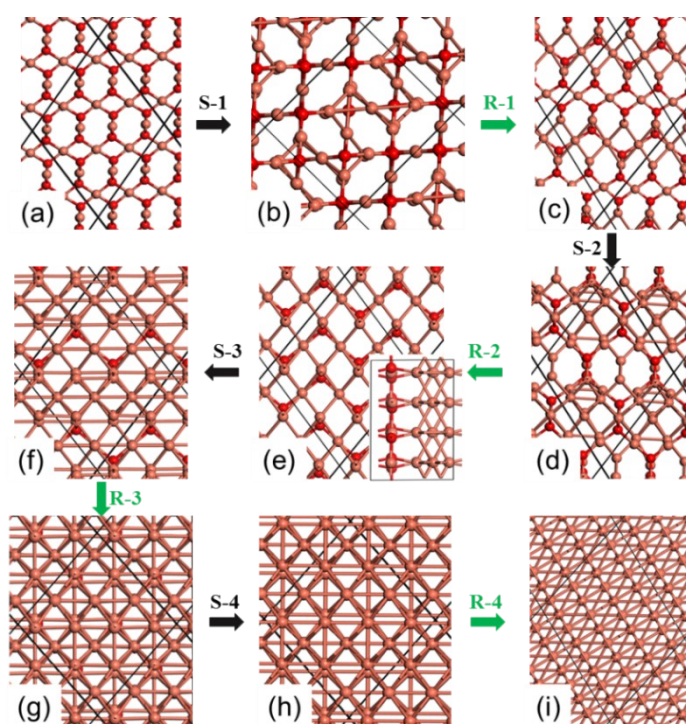

**Fig. S8** Key structures following oxygen desorption in oxygen desorption at  $C(\text{O}_v) \geq 50\%$ . (a)  $\text{Cu}_{32}\text{O}_{16}$  ( $C(\text{O}_v) = 50\%$ ), (b, c)  $\text{Cu}_{32}\text{O}_{12}$  ( $C(\text{O}_v) = 62.5\%$ ), (d, e)  $\text{Cu}_{32}\text{O}_8$  ( $C(\text{O}_v) = 75\%$ ), (f, g)  $\text{Cu}_{32}\text{O}_4$  ( $C(\text{O}_v) = 87.5\%$ ), and (h, i)  $\text{Cu}_{32}$  ( $C(\text{O}_v) = 100\%$ ).

The insert is a side view of the structure.

Fig. S8 shows the key structures following oxygen desorption in oxygen desorption at  $C(O_v) \geq 50\%$  progress and the  $Cu_{32}O_8$  bulk is shown in the Fig. S6d,e. Besides, by calculating the radial distribution functions (RDFs), which reflects the number of atoms at a given distance from a reference atom, we found two intense Cu-O peaks at 1.83 and 1.87 Å are present for  $Cu_{32}O_8$  with  $C(O_v)$  of 75% , which can be attributed to  $Cu_8O_8$  phase. In the meantime, a sharp Cu-Cu peak at 2.79 Å is present. When  $C(O_v)$  reaches 75% all oxygen atoms shift collectively towards b direction, resulting in an obvious phase separation. A clear phase interface is evident: one side is  $Cu_8O_8$  phase while the other side is  $Cu_{24}$  phase. Therefore, the  $Cu_{32}O_8$  structure is much more stable and more difficult to reduce.



## Coordinates for Cu<sub>32</sub>O<sub>8</sub> bulk and slab model structure

Cu<sub>32</sub>O<sub>8</sub> bulk

1.0

|               |               |              |
|---------------|---------------|--------------|
| 9.0991001129  | 0.0000000000  | 0.0000000000 |
| -0.1778604409 | 6.0615910772  | 0.0000000000 |
| 2.2222268721  | -0.1050862992 | 8.8203621522 |

Cu O

32 8

Cartesian

|             |             |             |
|-------------|-------------|-------------|
| 4.711925030 | 2.634822369 | 5.721151829 |
| 5.236828327 | 1.379392982 | 7.879493713 |
| 6.867763042 | 4.525094509 | 5.668141365 |
| 5.150534153 | 4.501486778 | 7.873496056 |
| 9.179484367 | 2.613944530 | 5.657204151 |
| 2.960286140 | 2.613527298 | 7.900310516 |
| 2.323229313 | 4.430129051 | 5.671581268 |
| 7.492165089 | 2.629914284 | 7.888402462 |
| 4.680833817 | 0.259591371 | 5.654734135 |
| 7.561298370 | 0.254685462 | 7.898104668 |
| 6.954509735 | 1.405236006 | 5.674756050 |
| 2.929644108 | 0.237881362 | 7.833098888 |
| 9.249724388 | 0.239489034 | 5.668141365 |
| 9.703171730 | 4.405934334 | 7.875348568 |
| 2.404556513 | 1.493177176 | 5.675815105 |
| 9.786029816 | 1.466051698 | 7.881346703 |
| 3.520458460 | 2.667339563 | 1.246758223 |
| 6.399384499 | 2.663643599 | 3.490305424 |
| 5.762372017 | 4.484912872 | 1.261576414 |
| 6.368161678 | 0.288358301 | 3.423358917 |
| 8.151023865 | 2.688095331 | 1.310793996 |
| 4.042505264 | 4.458663464 | 3.464814663 |
| 1.207173586 | 4.580613136 | 1.257519007 |
| 8.589365959 | 4.553726196 | 3.463403225 |
| 3.589517355 | 0.292888165 | 1.257342696 |
| 8.675386429 | 1.431632042 | 3.469401121 |
| 5.844436169 | 1.544566393 | 1.265810132 |
| 4.125602245 | 1.518354416 | 3.470988750 |
| 8.120955467 | 0.312862992 | 1.244464993 |
| 1.900272369 | 0.308746129 | 3.487747669 |
| 1.294801712 | 1.459484816 | 1.263869643 |
| 1.831668854 | 2.683859110 | 3.477604151 |
| 3.349042416 | 4.486788750 | 8.242275238 |
| 6.951290131 | 4.466311932 | 7.503570080 |

|             |             |             |
|-------------|-------------|-------------|
| 9.620723724 | 4.465140820 | 6.039919376 |
| 7.563853741 | 4.501021385 | 0.891474009 |
| 3.960847139 | 4.518775463 | 1.629738331 |
| 4.124742031 | 4.447511673 | 5.301390648 |
| 6.787928581 | 4.538000107 | 3.831918001 |
| 1.290987372 | 4.519958019 | 3.092418909 |

Cu<sub>32</sub>O<sub>8</sub> (100) slab

1.0

|               |              |               |
|---------------|--------------|---------------|
| 12.1283998489 | 0.0000000000 | 0.0000000000  |
| -0.1702180729 | 9.0950068557 | 0.0000000000  |
| 0.0000000000  | 0.0000000000 | 17.3542995453 |

Cu O

64 16

Cartesian

|              |             |             |
|--------------|-------------|-------------|
| 1.175915837  | 4.098483086 | 2.621540546 |
| -0.094334148 | 6.310570240 | 2.568262815 |
| 3.002179623  | 4.586157322 | 4.777985573 |
| 3.028934956  | 6.306023121 | 2.574857473 |
| 1.024011731  | 5.125400066 | 6.967230797 |
| 1.205971360  | 5.784606457 | 0.391339451 |
| 3.040571451  | 3.480931997 | 0.369125932 |
| 1.089450717  | 6.878008366 | 4.787877560 |
| 4.866919994  | 4.009442806 | 2.539975166 |
| 4.777401924  | 6.887285233 | 4.784927368 |
| 5.945281506  | 4.591341496 | 4.771738529 |
| 4.896500587  | 5.695020199 | 0.310468435 |
| 4.712784767  | 5.136132240 | 6.965147972 |
| 2.799896955  | 7.417068958 | 6.984931946 |
| 0.102533735  | 3.483842373 | 0.363225490 |
| 5.922987461  | 7.422071457 | 6.980072975 |
| 1.073179245  | 8.563949585 | 2.558717966 |
| 1.155218720  | 2.346511602 | 4.802108288 |
| 2.994427919  | 0.042837482 | 4.780068398 |
| 4.846110344  | 2.257016897 | 4.720716953 |
| 1.128321648  | 0.660115600 | 7.032482624 |
| 3.018684626  | 1.760156631 | 2.574683905 |
| 3.053420782  | 8.024069786 | 0.368084699 |
| 2.980244160  | 2.867928505 | 6.985452652 |
| 4.761964321  | 8.574045181 | 2.555593967 |
| 5.921299458  | 2.872294188 | 6.978510857 |
| 0.052990492  | 0.045929782 | 4.774861813 |
| 0.077207819  | 1.765340924 | 2.570171833 |
| 4.819197655  | 0.571439326 | 6.951959133 |

|              |             |             |
|--------------|-------------|-------------|
| 4.997524261  | 1.230372548 | 0.374332249 |
| -0.068892077 | 8.029345512 | 0.362704873 |
| 1.309456348  | 1.220822811 | 0.377976626 |
| 7.240115643  | 4.098483086 | 2.621540546 |
| 5.969865322  | 6.310570240 | 2.568262815 |
| 9.066379547  | 4.586157322 | 4.777985573 |
| 9.093134880  | 6.306023121 | 2.574857473 |
| 7.088211536  | 5.125400066 | 6.967230797 |
| 7.270171165  | 5.784606457 | 0.391339451 |
| 9.104771614  | 3.480931997 | 0.369125932 |
| 7.153651237  | 6.878008366 | 4.787877560 |
| 10.931119919 | 4.009442806 | 2.539975166 |
| 10.841601372 | 6.887285233 | 4.784927368 |
| 12.009480476 | 4.591341496 | 4.771738529 |
| 10.960700035 | 5.695020199 | 0.310468435 |
| 10.776985168 | 5.136132240 | 6.965147972 |
| 8.864095688  | 7.417068958 | 6.984931946 |
| 6.166733742  | 3.483842373 | 0.363225490 |
| 11.987186432 | 7.422071457 | 6.980072975 |
| 7.137379646  | 8.563949585 | 2.558717966 |
| 7.219418526  | 2.346511602 | 4.802108288 |
| 9.058627129  | 0.042837482 | 4.780068398 |
| 10.910310745 | 2.257016897 | 4.720716953 |
| 7.192521572  | 0.660115600 | 7.032482624 |
| 9.082883835  | 1.760156631 | 2.574683905 |
| 9.117620468  | 8.024069786 | 0.368084699 |
| 9.044445038  | 2.867928505 | 6.985452652 |
| 10.826164246 | 8.574045181 | 2.555593967 |
| 11.985499382 | 2.872294188 | 6.978510857 |
| 6.117190361  | 0.045929782 | 4.774861813 |
| 6.141407967  | 1.765340924 | 2.570171833 |
| 10.883398056 | 0.571439326 | 6.951959133 |
| 11.061723709 | 1.230372548 | 0.374332249 |
| 5.995307446  | 8.029345512 | 0.362704873 |
| 7.373655796  | 1.220822811 | 0.377976626 |
| 3.067089796  | 6.224440575 | 0.738078356 |
| 2.940961838  | 6.386058807 | 4.409554005 |
| 2.861473083  | 5.617440224 | 7.354231834 |
| 2.957629442  | 0.123237349 | 6.617020607 |
| 2.910885096  | 9.055898666 | 2.944851160 |
| 3.005110979  | 3.561150074 | 2.206078529 |
| 3.017433882  | 2.786073446 | 5.148847103 |
| 3.160607100  | 0.728691936 | 0.000000000 |
| 9.131289482  | 6.224440575 | 0.738078356 |

|             |             |             |
|-------------|-------------|-------------|
| 9.005162239 | 6.386058807 | 4.409554005 |
| 8.925673485 | 5.617440224 | 7.354231834 |
| 9.021830559 | 0.123237349 | 6.617020607 |
| 8.975084305 | 9.055898666 | 2.944851160 |
| 9.069311142 | 3.561150074 | 2.206078529 |
| 9.081633568 | 2.786073446 | 5.148847103 |
| 9.224806786 | 0.728691936 | 0.000000000 |
